# Supplementary material for: Direct Biomarkers of Microbial Translocation Correlate with Immune Activation in Adult Zambians with Environmental Enteropathy and Hepatosplenic Schistosomiasis
Source: PubMed Central journal article supplement (PMC5817780; doi:10.4269/ajtmh.17-0365), 2017-08-28
Supplement: tpmd170365.SD1.pdf [file tpmd170365.SD1.pdf]

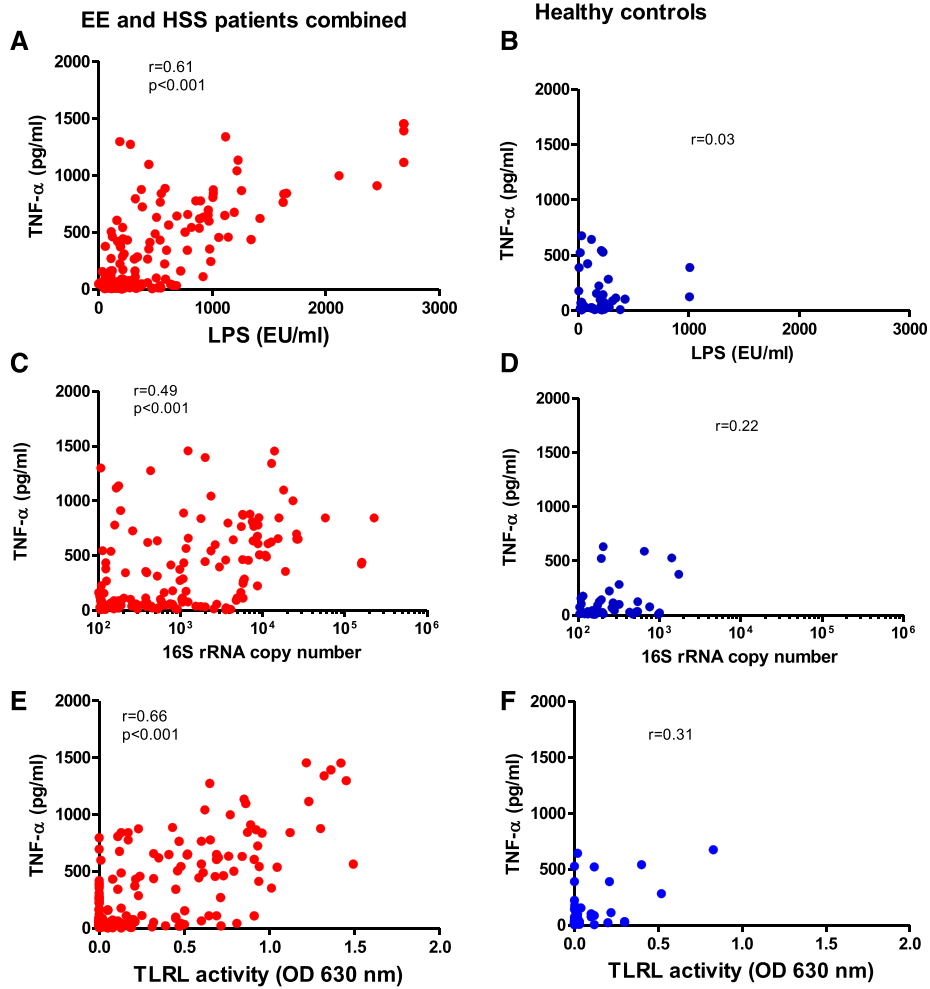

SUPPLEMENTAL FIGURE 1. Relationship between tumor necrosis factor- $\alpha$  (TNF- $\alpha$ ) and direct biomarkers of microbial translocation. Environmental enteropathy and hepatosplenic schistosomiasis patients combined correlations between TNF- $\alpha$  and lipopolysaccharide (LPS) (Panel A), TNF- $\alpha$  and 16S rRNA copy number (Panel C) and TNF- $\alpha$  and Toll-like receptor ligand (TLRL) activity (Panel E) and in healthy controls between TNF- $\alpha$  and LPS (Panel B), TNF- $\alpha$  and 16S rRNA copy number (Panel D) and TNF- $\alpha$  and TLRL activity (Panel F). Spearman correlations are shown.

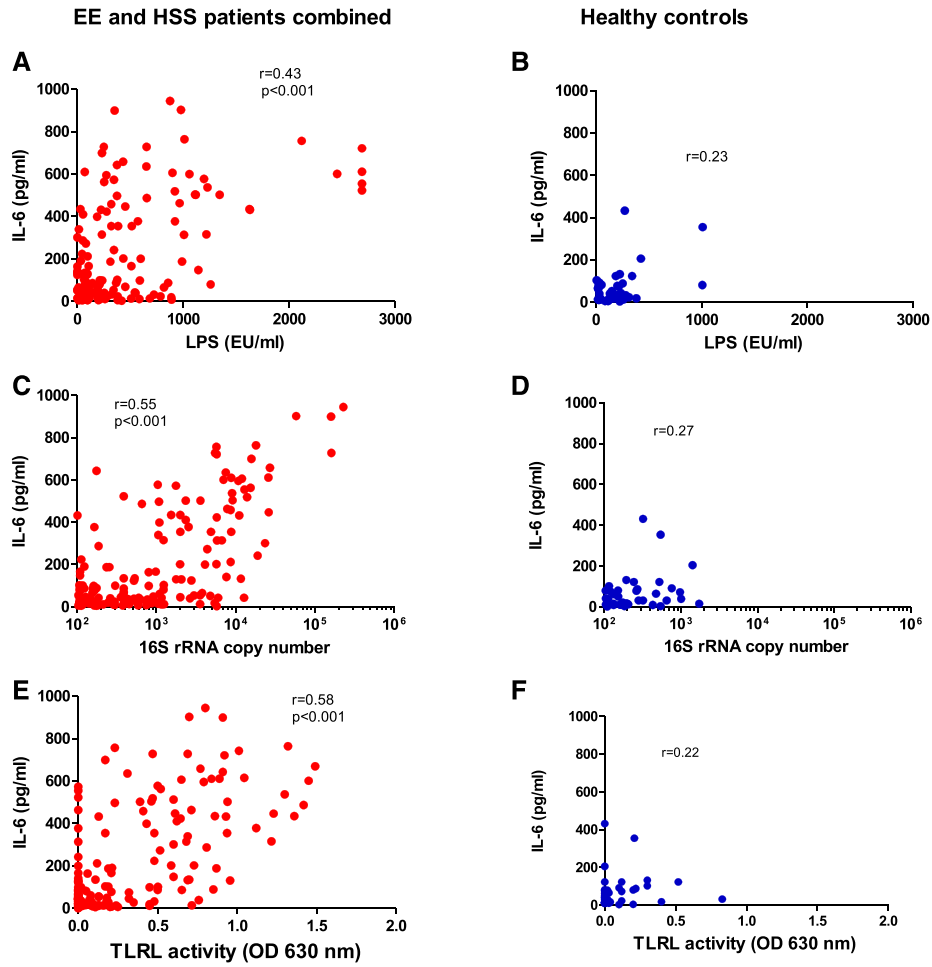

SUPPLEMENTAL FIGURE 2. Relationship between interleukin (IL)-6 and direct biomarkers of microbial translocation. Environmental enteropathy and hepatosplenic schistosomiasis patients combined correlations between IL-6 and lipopolysaccharide (LPS) (Panel A), IL-6 and 16S rRNA copy number (Panel C), and IL-6 and Toll-like receptor ligand (TLRL) activity (Panel E) and in healthy controls between IL-6 and LPS (Panel B), IL-6 and 16S rRNA copy number (Panel D), and IL-6 and TLRL activity (Panel F). Spearman correlations are shown.

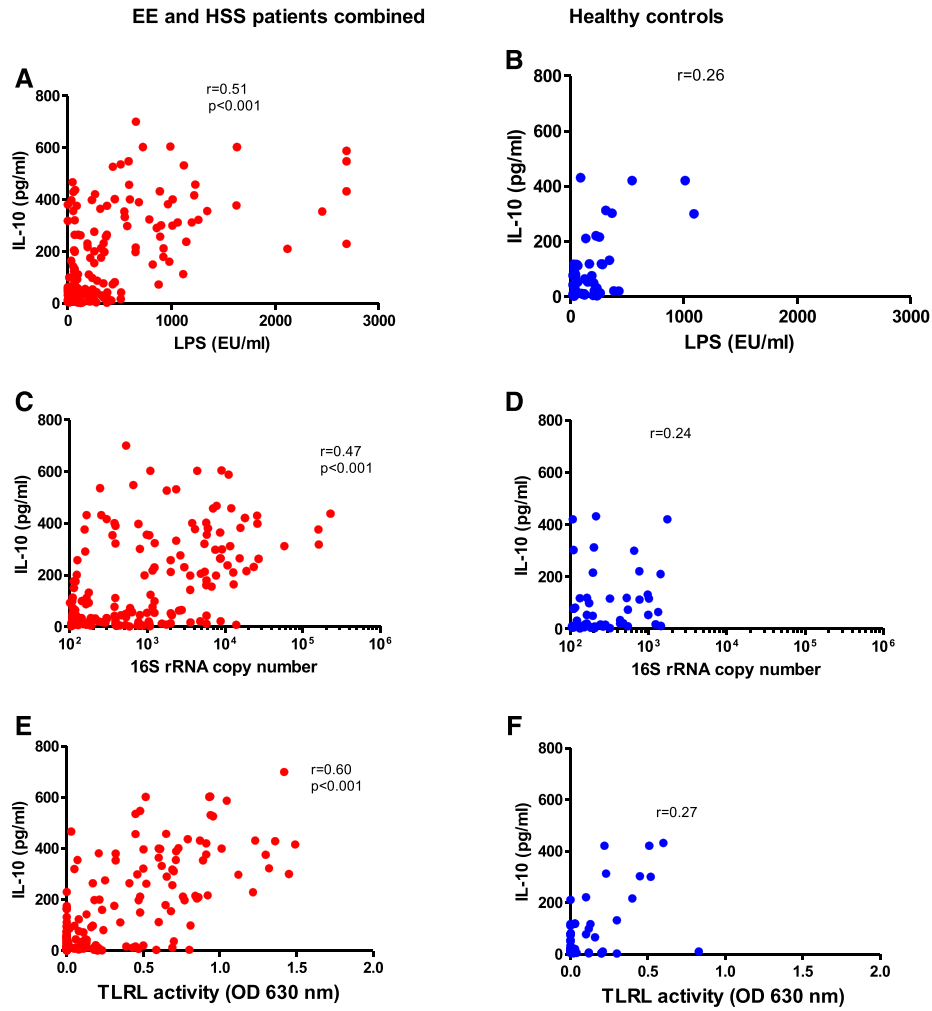

SUPPLEMENTAL FIGURE 3. Relationship between interleukin (IL)-10 and direct biomarkers of microbial translocation. Environmental enteropathy and hepatosplenic schistosomiasis patients combined correlations between IL-10 and lipopolysaccharide (LPS) (Panel **A**), IL-10 and 16S rRNA copy number (Panel **C**), and IL-10 and TLRL activity (Panel **E**) and in healthy controls between IL-10 and LPS (Panel **B**), IL-10 and 16S rRNA copy number (Panel **D**), and IL-10 and TLRL activity (Panel **F**). Spearman correlations are shown.
